# Supplementary material for: Factors Associated with E-Cigarette Use in U.S. Young Adult Never Smokers of Conventional Cigarettes: A Machine Learning Approach
Source: PubMed Central journal article supplement (PMC7579019; doi:10.3390/ijerph17197271), 2020-10-05
Supplement: ijerph-17-07271-s001.pdf [file ijerph-17-07271-s001.pdf]

Table S1: State and US territory-specific prevalence of current e-cigarette use among young adults who are never-smokers of conventional cigarettes

| <b>State / Territory</b> | <b>Current Sole E-cigarette User<br/>% (95% CI %)</b> | <b>State / Territory</b> | <b>Current Sole E-Cigarette User<br/>% (95% CI %)</b> |
|--------------------------|-------------------------------------------------------|--------------------------|-------------------------------------------------------|
| Guam                     | 8.7 (5.4–11.9)                                        | Massachusetts            | 4.5 (2.8–6.1)                                         |
| Michigan                 | 6.5 (5.1–8.0)                                         | Kansas                   | 4.5 (3.4–5.5)                                         |
| Wyoming                  | 6.5 (4.0–9.0)                                         | Montana                  | 4.4 (2.6–6.1)                                         |
| New Hampshire            | 6.4 (3.3–9.4)                                         | North Dakota             | 4.4 (2.8–6.0)                                         |
| Arizona                  | 6.4 (4.9–7.9)                                         | Louisiana                | 4.4 (2.6–6.3)                                         |
| Arkansas                 | 6.3 (3.1–9.5)                                         | Georgia                  | 4.4 (3.0–5.8)                                         |
| New Mexico               | 6.1 (4.0–8.2)                                         | Alabama                  | 4.3 (2.7–5.8)                                         |
| Colorado                 | 6.0 (4.7–7.3)                                         | Oregon                   | 4.3 (3.0–5.6)                                         |
| Hawaii                   | 5.9 (4.4–7.4)                                         | Illinois                 | 4.3 (2.8–5.7)                                         |
| Virginia                 | 5.9 (4.4–7.4)                                         | Indiana                  | 4.2 (3.1–5.4)                                         |
| Nevada                   | 5.6 (3.4–7.7)                                         | Iowa                     | 4.2 (3.0–5.4)                                         |
| Utah                     | 5.5 (4.5–6.5)                                         | Connecticut              | 4.1 (2.8–5.5)                                         |
| Mississippi              | 5.4 (3.2–7.5)                                         | California               | 4.0 (3.1–5.0)                                         |
| Kentucky                 | 5.3 (3.3–7.2)                                         | Missouri                 | 3.9 (2.4–5.4)                                         |
| Delaware                 | 5.3 (3.1–7.5)                                         | Rhode Island             | 3.9 (2.0–5.7)                                         |
| New Jersey               | 5.1 (3.5–6.7)                                         | South Carolina           | 3.6 (2.5–4.8)                                         |
| Tennessee                | 5.1 (3.1–7.0)                                         | North Carolina           | 3.6 (2.1–5.0)                                         |
| New York                 | 5.0 (3.9–6.0)                                         | Pennsylvania             | 3.6 (2.4–4.8)                                         |
| Wisconsin                | 5.0 (3.3–6.8)                                         | Alaska                   | 3.5 (1.0–5.9)                                         |
| Ohio                     | 4.9 (3.6–6.3)                                         | Texas                    | 3.3 (2.1–4.5)                                         |
| Oklahoma                 | 4.9 (3.1–6.8)                                         | Maryland                 | 2.9 (1.9–3.8)                                         |
| Vermont                  | 4.8 (2.7–7.0)                                         | Maine                    | 2.6 (1.4–3.8)                                         |
| Washington               | 4.8 (3.8–5.8)                                         | District of Columbia     | 2.5 (1.2–3.8)                                         |
| Minnesota                | 4.8 (3.9–5.7)                                         | West Virginia            | 2.2 (1.1–3.4)                                         |
| Idaho                    | 4.6 (2.9–6.2)                                         | South Dakota             | 2.0 (0.8–3.3)                                         |
| Nebraska                 | 4.6 (3.3–5.9)                                         | Puerto Rico              | 0.8 (0.3–1.4)                                         |
| Florida                  | 4.5 (3.4–5.6)                                         |                          |                                                       |
